# Supplementary material for: A HIF1α Regulatory Loop Links Hypoxia and Mitochondrial Signals in Pheochromocytomas
Source: PubMed Central journal article supplement (PMC1183527; doi:10.1371/journal.pgen.0010008), 2005-07-25
Supplement: pgen.0010008.sd001.pdf [file pgen.0010008.sd001.pdf]

Suppl. Data 1. Summary of clinical data and classification of pheochromocytomas by genetic groups.

|                   |                                |
|-------------------|--------------------------------|
| Age               | 4-78y                          |
| Gender            | 48 female<br>24 male           |
| Tumor location    | 63 adrenal<br>13 extra-adrenal |
| Malignant tumors* | 2                              |
| Sporadic tumors   | 37                             |
| Familial tumors   | 39                             |
| FP1               | 4                              |
| FP2               | 3                              |
| FP3               | 3                              |
| FP4               | 2                              |
| FP5               | 1                              |
| FP6               | 1                              |
| FP7               | 1                              |
| MEN 2A            | 10 <sup>a</sup>                |
| NF1               | 2 <sup>b</sup>                 |
| SDHB              | 5 <sup>c</sup>                 |
| SDHD              | 1                              |
| VHL               | 6 <sup>d</sup>                 |

\* defined by the presence of distant metastases; Hereditary samples represent variable numbers of independent families in this cohort: <sup>a</sup> MEN 2A tumors, five families; <sup>b</sup> NF1 tumors, two families; <sup>c</sup> SDHB tumors, five families; and <sup>d</sup> VHL tumors, three families; FP1-7 represent 7 independent families or individuals with familial history of pheochromocytoma without an identifiable mutation.
