# Supplementary material for: A HIF1α Regulatory Loop Links Hypoxia and Mitochondrial Signals in Pheochromocytomas
Source: PubMed Central journal article supplement (PMC1183527; doi:10.1371/journal.pgen.0010008), 2005-07-25
Supplement: pgen.0010008.sd002.pdf [file pgen.0010008.sd002.pdf]

**Suppl. Data 2. Filtered Gene List-Unsupervised Hierarchical Clustering of Pheochromocytomas**

[FILTERING\_CRITERIA]

Variation across samples: 0.65 < Standard deviation / Mean < 10.00

P call % in the array used >= 20%

| probe set   | gene                                                                                       | Accession   | LocusLink |
|-------------|--------------------------------------------------------------------------------------------|-------------|-----------|
| 200024_at   | ribosomal protein S5                                                                       | NM_001009.1 | 6193      |
| 200056_s_at | nuclear DNA-binding protein                                                                | NM_006333.1 | 10438     |
| 200096_s_at | ATPase, H+ transporting, lysosomal 9kDa, V0 subunit e                                      | AI862255    | 8992      |
| 200097_s_at | heterogeneous nuclear ribonucleoprotein K                                                  | AI701949    | 3190      |
| 200605_s_at | protein kinase, cAMP-dependent, regulatory, type I, alpha (tissue specific extinguisher 1) | NM_002734.1 | 5573      |
| 200606_at   | desmoplakin (DPI, DPII)                                                                    | NM_004415.1 | 1832      |
| 200650_s_at | lactate dehydrogenase A                                                                    | NM_005566.1 | 3939      |
| 200654_at   | procollagen-proline, 2-oxoglutarate 4-dioxygenase (proline 4-hydroxylase), beta polypept   | J02783.1    | 5034      |
| 200656_s_at | procollagen-proline, 2-oxoglutarate 4-dioxygenase (proline 4-hydroxylase), beta polypept   | NM_000918.1 | 5034      |
| 200662_s_at | translocase of outer mitochondrial membrane 20 (yeast) homolog                             | NM_014765.1 | 9804      |
| 200665_s_at | secreted protein, acidic, cysteine-rich (osteonectin)                                      | NM_003118.1 | 6678      |
| 200672_x_at | spectrin, beta, non-erythrocytic 1                                                         | NM_003128.1 | 6711      |
| 200750_s_at | RAN, member RAS oncogene family                                                            | AF054183.1  | 5901      |
| 200764_s_at | catenin (cadherin-associated protein), alpha 1 (102kDa                                     | AI826881    | 1495      |
| 200782_at   | annexin A5                                                                                 | NM_001154.2 | 308       |
| 200783_s_at | stathmin 1/oncoprotein 18                                                                  | NM_005563.2 | 3925      |
| 200800_s_at | heat shock 70kDa protein 1A                                                                | NM_005345.3 | 3303      |
| 200832_s_at | stearoyl-CoA desaturase (delta-9-desaturase)                                               | AB032261.1  | 6319      |
| 200853_at   | H2A histone family, member Z                                                               | NM_002106.1 | 3015      |
| 200862_at   | 24-dehydrocholesterol reductase                                                            | NM_014762.1 | 1718      |
| 200866_s_at | prosaposin (variant Gaucher disease and variant metachromatic leukodystrophy)              | M32221.1    | 5660      |
| 200883_at   | ubiquinol-cytochrome c reductase core protein II                                           | NM_003366.1 | 7385      |
| 200884_at   | creatine kinase, brain                                                                     | NM_001823.1 | 1152      |
| 200968_s_at | peptidylprolyl isomerase B (cyclophilin B)                                                 | NM_000942.1 | 5479      |
| 200973_s_at | tetraspan 3                                                                                | NM_005724.1 | 10099     |
| 200974_at   | actin, alpha 2, smooth muscle, aorta                                                       | NM_001613.1 | 59        |
| 201005_at   | CD9 antigen (p24)                                                                          | NM_001769.1 | 928       |
| 201013_s_at | phosphoribosylaminoimidazole carboxylase, phosphoribosylaminoimidazole succinocarbo        | AA902652    | 10606     |
| 201020_at   | tyrosine 3-monooxygenase/tryptophan 5-monooxygenase activation protein, eta polypept       | NM_003405.1 | 7533      |
| 201050_at   | similar to vaccinia virus HindIII K4L ORF                                                  | NM_012268.1 | 23646     |
| 201058_s_at | myosin, light polypeptide 9, regulatory                                                    | NM_006097.1 | 10398     |
| 201078_at   | transmembrane 9 superfamily member 2                                                       | NM_004800.1 | 9375      |
| 201082_s_at | dynactin 1 (p150, glued homolog, Drosophila)                                               | NM_004082.2 | 1639      |
| 201110_s_at | thrombospondin 1                                                                           | NM_003246.1 | 7057      |
| 201117_s_at | carboxypeptidase E                                                                         | NM_001873.1 | 1363      |
| 201132_at   | heterogeneous nuclear ribonucleoprotein H2 (H')                                            | NM_019597.1 | 3188      |
| 201162_at   | insulin-like growth factor binding protein 7                                               | NM_001553.1 | 3490      |
| 201163_s_at | insulin-like growth factor binding protein 7                                               | NM_001553.1 | 3490      |
| 201229_s_at | ariadne homolog 2 (Drosophila)                                                             | BC000422.1  | 10425     |
| 201242_s_at | ATPase, Na+/K+ transporting, beta 1 polypeptide                                            | BC000006.1  | 481       |
| 201243_s_at | ATPase, Na+/K+ transporting, beta 1 polypeptide                                            | NM_001677.1 | 481       |
| 201272_at   | aldo-keto reductase family 1, member B1 (aldose reductase)                                 | NM_001628.1 | 231       |
| 201280_s_at | disabled homolog 2, mitogen-responsive phosphoprotein (Drosophila)                         | NM_001343.1 | 1601      |
| 201315_x_at | interferon induced transmembrane protein 2 (1-8D)                                          | NM_006435.1 | 10581     |
| 201324_at   | epithelial membrane protein 1                                                              | NM_001423.1 | 2012      |
| 201348_at   | glutathione peroxidase 3 (plasma)                                                          | NM_002084.2 | 2878      |

|             |                                                                                           |             |       |
|-------------|-------------------------------------------------------------------------------------------|-------------|-------|
| 201369_s_at | zinc finger protein 36, C3H type-like 2                                                   | NM_006887.1 | 678   |
| 201387_s_at | ubiquitin carboxyl-terminal esterase L1 (ubiquitin thiolesterase)                         | NM_004181.1 | 7345  |
| 201416_at   | SRY (sex determining region Y)-box 4                                                      | NM_003107.1 | 6659  |
| 201426_s_at | vimentin                                                                                  | AI922599    | 7431  |
| 201432_at   | catalase                                                                                  | NM_001752.1 | 847   |
| 201465_s_at | v-jun sarcoma virus 17 oncogene homolog (avian)                                           | BC002646.1  | 3725  |
| 201496_x_at | myosin, heavy polypeptide 11, smooth muscle                                               | AI889739    | 4629  |
| 201497_x_at | myosin, heavy polypeptide 11, smooth muscle                                               | NM_022844.1 | 4629  |
| 201505_at   | laminin, beta 1                                                                           | NM_002291.1 | 3912  |
| 201552_at   | lysosomal-associated membrane protein 1                                                   | NM_005561.2 | 3916  |
| 201578_at   | podocalyxin-like                                                                          | NM_005397.1 | 5420  |
| 201601_x_at | interferon induced transmembrane protein 1 (9-27)                                         | NM_003641.1 | 8519  |
| 201619_at   | peroxiredoxin 3                                                                           | NM_006793.1 | 10935 |
| 201630_s_at | acid phosphatase 1, soluble                                                               | NM_004300.1 | 52    |
| 201650_at   | keratin 19                                                                                | NM_002276.1 | 3880  |
| 201667_at   | gap junction protein, alpha 1, 43kDa (connexin 43)                                        | NM_000165.2 | 2697  |
| 201669_s_at | myristoylated alanine-rich protein kinase C substrate                                     | NM_002356.4 | 4082  |
| 201693_s_at | early growth response 1                                                                   | AV733950    | 1958  |
| 201694_s_at | early growth response 1                                                                   | NM_001964.1 | 1958  |
| 201744_s_at | lumican                                                                                   | NM_002345.1 | 4060  |
| 201761_at   | methylene tetrahydrofolate dehydrogenase (NAD+ dependent), methenyltetrahydrofolate       | NM_006636.2 | 10797 |
| 201839_s_at | tumor-associated calcium signal transducer 1                                              | NM_002354.1 | 4072  |
| 201841_s_at | heat shock 27kDa protein 1                                                                | NM_001540.2 | 3315  |
| 201852_x_at | collagen, type III, alpha 1 (Ehlers-Danlos syndrome type IV, autosomal dominant)          | AI813758    | 1281  |
| 201858_s_at | proteoglycan 1, secretory granule                                                         | J03223.1    | 5552  |
| 201860_s_at | plasminogen activator, tissue                                                             | NM_000930.1 | 5327  |
| 201867_s_at | transducin (beta)-like 1X-linked                                                          | NM_005647.1 | 6907  |
| 201893_x_at | decorin                                                                                   | AF138300.1  | 1634  |
| 201909_at   | ribosomal protein S4, Y-linked                                                            | NM_001008.1 | 6192  |
| 201923_at   | peroxiredoxin 4                                                                           | NM_006406.1 | 10549 |
| 201951_at   | activated leukocyte cell adhesion molecule                                                | NM_001627.1 | 214   |
| 202015_x_at | methionyl aminopeptidase 2                                                                | NM_006838.1 | 10988 |
| 202016_at   | mesoderm specific transcript homolog (mouse)                                              | NM_002402.1 | 4232  |
| 202035_s_at | secreted frizzled-related protein 1                                                       | AI332407    | 6422  |
| 202054_s_at | aldehyde dehydrogenase 3 family, member A2                                                | NM_000382.1 | 224   |
| 202149_at   | enhancer of filamentation 1 (cas-like docking; Crk-associated substrate related)          | AL136139    | 10543 |
| 202196_s_at | dickkopf homolog 3 ( <i>Xenopus laevis</i> )                                              | NM_013253.1 | 27122 |
| 202232_s_at | dendritic cell protein                                                                    | NM_006360.1 | 10480 |
| 202237_at   | nicotinamide N-methyltransferase                                                          | NM_006169.1 | 4837  |
| 202241_at   | phosphoprotein regulated by mitogenic pathways                                            | NM_025195.1 | 10221 |
| 202243_s_at | proteasome (prosome, macropain) subunit, beta type, 4                                     | NM_002796.1 | 5692  |
| 202340_x_at | nuclear receptor subfamily 4, group A, member 1                                           | NM_002135.1 | 3164  |
| 202363_at   | sparc/osteonectin, cwcv and kazal-like domains proteoglycan (testican)                    | AF231124.1  | 6695  |
| 202404_s_at | collagen, type I, alpha 2                                                                 | NM_000089.1 | 1278  |
| 202409_at   | Homo sapiens cDNA: FLJ22066 fis, clone HEP10611                                           | X07868      |       |
| 202410_x_at | insulin-like growth factor 2 (somatomedin A)                                              | NM_000612.2 | 3481  |
| 202411_at   | interferon, alpha-inducible protein 27                                                    | NM_005532.1 | 3429  |
| 202422_s_at | fatty-acid-Coenzyme A ligase, long-chain 4                                                | NM_022977.1 | 2182  |
| 202436_s_at | cytochrome P450, subfamily I (dioxin-inducible), polypeptide 1 (glaucoma 3, primary infar | NM_000104.2 | 1545  |
| 202508_s_at | synaptosomal-associated protein, 25kDa                                                    | NM_003081.1 | 6616  |
| 202524_s_at | KIAA0275 gene product                                                                     | NM_014767.1 | 9806  |
| 202551_s_at | cysteine-rich motor neuron 1                                                              | BG546884    | 51232 |

|             |                                                                                                |             |       |
|-------------|------------------------------------------------------------------------------------------------|-------------|-------|
| 202552_s_at | cysteine-rich motor neuron 1                                                                   | NM_016441.1 | 51232 |
| 202591_s_at | single-stranded DNA binding protein                                                            | NM_003143.1 | 6742  |
| 202601_s_at | HIV TAT specific factor 1                                                                      | AI373539    | 27336 |
| 202602_s_at | HIV TAT specific factor 1                                                                      | NM_014500.1 | 27336 |
| 202635_s_at | polymerase (RNA) II (DNA directed) polypeptide K, 7.0kDa                                       | NM_005034.1 | 5440  |
| 202672_s_at | activating transcription factor 3                                                              | NM_001674.1 | 467   |
| 202718_at   | insulin-like growth factor binding protein 2, 36kDa                                            | NM_000597.1 | 3485  |
| 202768_at   | FBJ murine osteosarcoma viral oncogene homolog B                                               | NM_006732.1 | 2354  |
| 202859_x_at | interleukin 8                                                                                  | NM_000584.1 | 3576  |
| 202917_s_at | S100 calcium binding protein A8 (calgranulin A)                                                | NM_002964.2 | 6279  |
| 202935_s_at | SRY (sex determining region Y)-box 9 (campomelic dysplasia, autosomal sex-reversal)            | AI382146    | 6662  |
| 202948_at   | interleukin 1 receptor, type I                                                                 | NM_000877.1 | 3554  |
| 202992_at   | complement component 7                                                                         | NM_000587.1 | 730   |
| 203000_at   | EST                                                                                            | BF967657    |       |
| 203001_s_at | stathmin-like 2                                                                                | NM_007029.1 | 11075 |
| 203029_s_at | protein tyrosine phosphatase, receptor type, N polypeptide 2                                   | NM_002847.1 | 5799  |
| 203060_s_at | 3'-phosphoadenosine 5'-phosphosulfate synthase 2                                               | AF074331.1  | 9060  |
| 203132_at   | retinoblastoma 1 (including osteosarcoma)                                                      | NM_000321.1 | 5925  |
| 203180_at   | aldehyde dehydrogenase 1 family, member A3                                                     | NM_000693.1 | 220   |
| 203243_s_at | LIM protein (similar to rat protein kinase C-binding enigma)                                   | NM_006457.1 | 10611 |
| 203254_s_at | talin 1                                                                                        | NM_006289.1 | 7094  |
| 203382_s_at | apolipoprotein E                                                                               | NM_000041.1 | 348   |
| 203392_s_at | C-terminal binding protein 1                                                                   | NM_001328.1 | 1487  |
| 203413_at   | NEL-like 2 (chicken)                                                                           | NM_006159.1 | 4753  |
| 203485_at   | reticulon 1                                                                                    | NM_021136.1 | 6252  |
| 203607_at   | Sac domain-containing inositol phosphatase 2                                                   | NM_014937.1 | 22876 |
| 203619_s_at | lifeguard                                                                                      | NM_012306.1 | 23017 |
| 203628_at   | insulin-like growth factor 1 receptor                                                          | NM_000875.2 | 3480  |
| 203646_at   | ferredoxin 1                                                                                   | NM_004109.2 | 2230  |
| 203647_s_at | ferredoxin 1                                                                                   | M18003.1    | 2230  |
| 203803_at   | prenylcysteine lyase                                                                           | N45309      | 51449 |
| 203860_at   | propionyl Coenzyme A carboxylase, alpha polypeptide                                            | NM_000282.1 | 5095  |
| 203889_at   | secretory granule, neuroendocrine protein 1 (7B2 protein)                                      | NM_003020.1 | 6447  |
| 203896_s_at | phospholipase C, beta 4                                                                        | NM_000933.1 | 5332  |
| 203934_at   | kinase insert domain receptor (a type III receptor tyrosine kinase)                            | NM_002253.1 | 3791  |
| 203961_at   | nebulette                                                                                      | AL157398    | 10529 |
| 203962_s_at | nebulette                                                                                      | NM_006393.1 | 10529 |
| 203980_at   | fatty acid binding protein 4, adipocyte                                                        | NM_001442.1 | 2167  |
| 203998_s_at | synaptotagmin I                                                                                | NM_005639.1 | 6857  |
| 203999_at   | synaptotagmin I                                                                                | NM_005639.1 | 6857  |
| 204014_at   | dual specificity phosphatase 4                                                                 | NM_001394.2 | 1846  |
| 204018_x_at | hemoglobin, alpha 1                                                                            | NM_000558.2 | 3039  |
| 204035_at   | secretogranin II (chromogranin C)                                                              | NM_003469.2 | 7857  |
| 204071_s_at | tumor protein p53-binding protein                                                              | NM_005802.1 | 10210 |
| 204081_at   | neurogranin (protein kinase C substrate, RC3)                                                  | NM_006176.1 | 4900  |
| 204102_s_at | eukaryotic translation elongation factor 2                                                     | NM_001961.1 | 1938  |
| 204120_s_at | adenosine kinase                                                                               | NM_001123.1 | 132   |
| 204121_at   | growth arrest and DNA-damage-inducible, gamma                                                  | NM_006705.2 | 10912 |
| 204141_at   | tubulin, beta polypeptide                                                                      | NM_001069.1 | 7280  |
| 204151_x_at | aldo-keto reductase family 1, member C1 (dihydrodiol dehydrogenase 1; 20-alpha (3- $\alpha$ )- | NM_001353.2 | 1645  |
| 204224_s_at | GTP cyclohydrolase 1 (dopa-responsive dystonia)                                                | NM_000161.1 | 2643  |
| 204260_at   | chromogranin B (secretogranin 1)                                                               | NM_001819.1 | 1114  |

|             |                                                                                              |             |       |
|-------------|----------------------------------------------------------------------------------------------|-------------|-------|
| 204273_at   | endothelin receptor type B                                                                   | NM_000115.1 | 1910  |
| 204337_at   | regulator of G-protein signalling 4                                                          | AL514445    | 5999  |
| 204400_at   | signal transduction protein (SH3 containing)                                                 | NM_005864.1 | 10278 |
| 204409_s_at | eukaryotic translation initiation factor 1A, Y chromosome                                    | BC005248.1  | 9086  |
| 204465_s_at | interneixin neuronal intermediate filament protein, alpha                                    | NM_004692.1 | 9118  |
| 204472_at   | GTP binding protein overexpressed in skeletal muscle                                         | NM_005261.1 | 2669  |
| 204557_s_at | zinc-finger protein DZIP1                                                                    | NM_014934.1 | 22873 |
| 204597_x_at | stanniocalcin 1                                                                              | NM_003155.1 | 6781  |
| 204621_s_at | nuclear receptor subfamily 4, group A, member 2                                              | AI935096    | 4929  |
| 204622_x_at | nuclear receptor subfamily 4, group A, member 2                                              | NM_006186.1 | 4929  |
| 204665_at   | hypothetical protein FLJ21168                                                                | NM_025073.1 | 80143 |
| 204675_at   | steroid-5-alpha-reductase, alpha polypeptide 1 (3-oxo-5 alpha-steroid delta 4-dehydrogenase) | NM_001047.1 | 6715  |
| 204697_s_at | chromogranin A (parathyroid secretory protein 1)                                             | NM_001275.2 | 1113  |
| 204719_at   | ATP-binding cassette, sub-family A (ABC1), member 8                                          | NM_007168.1 | 10351 |
| 204723_at   | voltage-gated sodium channel beta-3 subunit (scn3b gene)                                     | NM_018400.1 | 55800 |
| 204743_at   | neuronal protein                                                                             | NM_013259.1 | 29114 |
| 204748_at   | prostaglandin-endoperoxide synthase 2 (prostaglandin G/H synthase and cyclooxygenase)        | NM_000963.1 | 5743  |
| 204850_s_at | doublecortin; lissencephaly, X-linked (doublecortin)                                         | NM_000555.1 | 1641  |
| 204869_at   | proprotein convertase subtilisin/kexin type 2                                                | AL031664    | 5126  |
| 204870_s_at | proprotein convertase subtilisin/kexin type 2                                                | NM_002594.1 | 5126  |
| 204897_at   | prostaglandin E receptor 4 (subtype EP4)                                                     | NM_000958.1 | 5734  |
| 204916_at   | receptor (calcitonin) activity modifying protein 1                                           | NM_005855.1 | 10267 |
| 205000_at   | DEAD/H (Asp-Glu-Ala-Asp/His) box polypeptide, Y chromosome                                   | NM_004660.2 | 8653  |
| 205013_s_at | adenosine A2a receptor                                                                       | NM_000675.2 | 135   |
| 205048_s_at | phosphoserine phosphatase-like                                                               | NM_003832.1 | 8781  |
| 205083_at   | aldehyde oxidase 1                                                                           | NM_001159.2 | 316   |
| 205109_s_at | Rho guanine nucleotide exchange factor (GEF) 4                                               | NM_015320.1 | 50649 |
| 205113_at   | neurofilament 3 (150kDa medium)                                                              | NM_005382.1 | 4741  |
| 205114_s_at | chemokine (C-C motif) ligand 3                                                               | NM_002983.1 | 6348  |
| 205187_at   | MAD, mothers against decapentaplegic homolog 5 (Drosophila)                                  | AF010601.1  | 4090  |
| 205206_at   | Kallmann syndrome 1 sequence                                                                 | NM_000216.1 | 3730  |
| 205278_at   | glutamate decarboxylase 1 (brain, 67kDa)                                                     | NM_000817.1 | 2571  |
| 205280_at   | glycine receptor, beta                                                                       | NM_000824.1 | 2743  |
| 205281_s_at | phosphatidylinositol glycan, class A (paroxysmal nocturnal hemoglobinuria)                   | NM_002641.1 | 5277  |
| 205292_s_at | heterogeneous nuclear ribonucleoprotein A2/B1                                                | NM_002137.1 | 3181  |
| 205311_at   | dopa decarboxylase (aromatic L-amino acid decarboxylase)                                     | NM_000790.1 | 1644  |
| 205352_at   | serine (or cysteine) proteinase inhibitor, clade I (neuroserpin), member 1                   | NM_005025.1 | 5274  |
| 205358_at   | glutamate receptor, ionotropic, AMPA 2                                                       | NM_000826.1 | 2891  |
| 205366_s_at | homeo box B6                                                                                 | NM_018952.1 | 3216  |
| 205413_at   | chromosome 11 open reading frame 8                                                           | NM_001584.1 | 744   |
| 205433_at   | butyrylcholinesterase                                                                        | NM_000055.1 | 590   |
| 205483_s_at | interferon-stimulated protein, 15 kDa                                                        | NM_005101.1 | 9636  |
| 205586_x_at | VGF nerve growth factor inducible                                                            | NM_003378.1 | 7425  |
| 205633_s_at | aminolevulinic acid synthase 1                                                               | NM_000688.1 | 211   |
| 205728_at   | odc, odd Oz/ten-m homolog 1(Drosophila)                                                      | AL022718    | 10178 |
| 205795_at   | neurexin 3                                                                                   | NM_004796.1 | 9369  |
| 205825_at   | proprotein convertase subtilisin/kexin type 1                                                | NM_000439.2 | 5122  |
| 205830_at   | calmegin                                                                                     | NM_004362.1 | 1047  |
| 205857_at   | solute carrier family 18 (vesicular monoamine), member 2                                     | AI269290    | 6571  |
| 205923_at   | reelin                                                                                       | NM_005045.1 | 5649  |
| 205952_at   | potassium channel, subfamily K, member 3                                                     | NM_002246.1 | 3777  |
| 205978_at   | klotho                                                                                       | NM_004795.1 | 9365  |

|             |                                                                                                                       |             |        |
|-------------|-----------------------------------------------------------------------------------------------------------------------|-------------|--------|
| 206001_at   | neuropeptide Y                                                                                                        | NM_000905.1 | 4852   |
| 206042_x_at | SNRPN upstream reading frame                                                                                          | NM_022804.1 | 8926   |
| 206080_at   | KIAA0450 gene product                                                                                                 | NM_014638.1 | 9651   |
| 206104_at   | ISL1 transcription factor, LIM/homeodomain, (islet-1)                                                                 | NM_002202.1 | 3670   |
| 206115_at   | early growth response 3                                                                                               | NM_004430.1 | 1960   |
| 206162_x_at | synaptotagmin V                                                                                                       | NM_003180.1 | 6861   |
| 206163_at   | mab-21-like 1 (C. elegans)                                                                                            | NM_005584.1 | 4081   |
| 206172_at   | interleukin 13 receptor, alpha 2                                                                                      | NM_000640.1 | 3598   |
| 206339_at   | cocaine- and amphetamine-regulated transcript                                                                         | NM_004291.1 | 9607   |
| 206434_at   | testican 3                                                                                                            | NM_016950.1 | 50859  |
| 206450_at   | dopamine beta-hydroxylase (dopamine beta-monoxygenase)                                                                | NM_000787.1 | 1621   |
| 206478_at   | KIAA0125 gene product                                                                                                 | NM_014792.1 | 9834   |
| 206502_s_at | insulinoma-associated 1                                                                                               | NM_002196.1 | 3642   |
| 206552_s_at | tachykinin, precursor 1 (substance K, substance P, neurokinin 1, neurokinin 2, neuromedin B)                          | NM_003182.1 | 6863   |
| 206598_at   | insulin                                                                                                               | NM_000207.1 | 3630   |
| 206637_at   | G protein-coupled receptor 105                                                                                        | NM_014879.1 | 9934   |
| 206698_at   | Kell blood group precursor (McLeod phenotype)                                                                         | NM_021083.1 | 7504   |
| 206793_at   | phenylethanolamine N-methyltransferase                                                                                | NM_002686.1 | 5409   |
| 207002_s_at | pleiomorphic adenoma gene-like 1                                                                                      | NM_002656.1 | 5325   |
| 207009_at   | paired mesoderm homeobox 2b                                                                                           | NM_003924.2 | 8929   |
| 207076_s_at | argininosuccinate synthetase                                                                                          | NM_000050.1 | 445    |
| 207447_s_at | UDP-N-acetylglucosamine:alpha-1,3-D-mannoside beta-1,4-N-acetylglucosaminyltransferase                                | NM_013244.1 | 25834  |
| 207695_s_at | immunoglobulin superfamily, member 1                                                                                  | NM_001555.1 | 3547   |
| 207768_at   | early growth response 4                                                                                               | NM_001965.1 | 1961   |
| 207974_s_at | S-phase kinase-associated protein 1A (p19A)                                                                           | NM_006930.1 | 6500   |
| 207980_s_at | Cbp/p300-interacting transactivator, with Glu/Asp-rich carboxy-terminal domain, 2                                     | NM_006079.1 | 10370  |
| 208291_s_at | tyrosine hydroxylase                                                                                                  | NM_000360.1 | 7054   |
| 208308_s_at | glucose phosphate isomerase                                                                                           | NM_000175.1 | 2821   |
| 208319_s_at | RNA binding motif protein 3                                                                                           | NM_006743.1 | 5935   |
| 208451_s_at | complement component 4B                                                                                               | NM_000592.2 | 721    |
| 208517_x_at | basic transcription factor 3                                                                                          | NM_001207.1 | 689    |
| 208605_s_at | neurotrophic tyrosine kinase, receptor, type 1                                                                        | NM_002529.2 | 4914   |
| 208623_s_at | villin 2 (ezrin)                                                                                                      | J05021.1    | 7430   |
| 208650_s_at | CD24 antigen (small cell lung carcinoma cluster 4 antigen)                                                            | BG327863    | 934    |
| 208651_x_at | CD24 antigen (small cell lung carcinoma cluster 4 antigen)                                                            | M58664.1    | 934    |
| 208669_s_at | CREBBP/EP300 inhibitory protein 1                                                                                     | AF109873.1  | 23741  |
| 208671_at   | KIAA1253 protein                                                                                                      | AF164794.1  | 57515  |
| 208687_x_at | heat shock 70kDa protein 8                                                                                            | AF352832.1  | 3312   |
| 208689_s_at | ribophorin II                                                                                                         | BC003560.1  | 6185   |
| 208729_x_at | major histocompatibility complex, class I, B                                                                          | D83043.1    | 3106   |
| 208743_s_at | tyrosine 3-monooxygenase/tryptophan 5-monooxygenase activation protein, beta polypeptide                              | BC001359.1  | 7529   |
| 208791_at   | clusterin (complement lysis inhibitor, SP-40,40, sulfated glycoprotein 2, testosterone-repressible element-1 protein) | M25915.1    | 1191   |
| 208792_s_at | clusterin (complement lysis inhibitor, SP-40,40, sulfated glycoprotein 2, testosterone-repressible element-1 protein) | M25915.1    | 1191   |
| 208810_at   | similar to MRJ gene for a member of the DNAJ protein family (H. sapiens)                                              | AF080569.1  | 136442 |
| 208850_s_at | Thy-1 cell surface antigen                                                                                            | AL558479    | 7070   |
| 208892_s_at | dual specificity phosphatase 6                                                                                        | BC003143.1  | 1848   |
| 208944_at   | transforming growth factor, beta receptor II (70/80kDa)                                                               | D50683.1    | 7048   |
| 209004_s_at | F-box and leucine-rich repeat protein 5                                                                               | AF142481.1  | 26234  |
| 209070_s_at | regulator of G-protein signalling 5                                                                                   | AI183997    | 8490   |
| 209101_at   | connective tissue growth factor                                                                                       | M92934.1    | 1490   |
| 209116_x_at | hemoglobin, beta                                                                                                      | M25079.1    | 3043   |
| 209138_x_at | immunoglobulin lambda locus                                                                                           | M87790.1    | 3535   |

|             |                                                                                                        |            |       |
|-------------|--------------------------------------------------------------------------------------------------------|------------|-------|
| 209140_x_at | major histocompatibility complex, class I, B                                                           | L42024.1   | 3106  |
| 209147_s_at | phosphatidic acid phosphatase type 2A                                                                  | AB000888.1 | 8611  |
| 209160_at   | aldo-keto reductase family 1, member C3 (3-alpha hydroxysteroid dehydrogenase, type II)                | AB018580.1 | 8644  |
| 209163_at   | cytochrome b-561                                                                                       | AL514271   | 1534  |
| 209164_s_at | cytochrome b-561                                                                                       | BC002976.1 | 1534  |
| 209183_s_at | decidual protein induced by progesterone                                                               | AL136653.1 | 11067 |
| 209189_at   | v-fos FBJ murine osteosarcoma viral oncogene homolog                                                   | BC004490.1 | 2353  |
| 209243_s_at | zinc finger, imprinted 2                                                                               | AF208967.1 | 23619 |
| 209278_s_at | tissue factor pathway inhibitor 2                                                                      | L27624.1   | 7980  |
| 209318_x_at | pleiomorphic adenoma gene-like 1                                                                       | BG547855   | 5325  |
| 209328_x_at | hypothetical protein HSPC111                                                                           | BC000587.1 | 51491 |
| 209348_s_at | v-maf musculoaponeurotic fibrosarcoma oncogene homolog (avian)                                         | AF055376.1 | 4094  |
| 209355_s_at | phosphatidic acid phosphatase type 2B                                                                  | AB000889.1 | 8613  |
| 209357_at   | Cbp/p300-interacting transactivator, with Glu/Asp-rich carboxy-terminal domain, 2                      | AF109161.1 | 10370 |
| 209443_at   | serine (or cysteine) proteinase inhibitor, clade A (alpha-1 antiproteinase, antitrypsin), mer J02639.1 |            | 5104  |
| 209458_x_at | hemoglobin, alpha 1                                                                                    | AF105974.1 | 3039  |
| 209459_s_at | NPD009 protein                                                                                         | AF237813.1 | 57416 |
| 209460_at   | NPD009 protein                                                                                         | AF237813.1 | 57416 |
| 209462_at   | amyloid beta (A4) precursor-like protein 1                                                             | U48437.1   | 333   |
| 209465_x_at | pleiotrophin (heparin binding growth factor 8, neurite growth-promoting factor 1)                      | AL565812   | 5764  |
| 209466_x_at | pleiotrophin (heparin binding growth factor 8, neurite growth-promoting factor 1)                      | M57399.1   | 5764  |
| 209496_at   | retinoic acid receptor responder (tazarotene induced) 2                                                | BC000069.1 | 5919  |
| 209570_s_at | DNA segment on chromosome 4 (unique) 234 expressed sequence                                            | BC001745.1 | 27065 |
| 209598_at   | paraneoplastic antigen MA2                                                                             | AB020690.1 | 10687 |
| 209602_s_at | GATA binding protein 3                                                                                 | AI796169   | 2625  |
| 209613_s_at | alcohol dehydrogenase IB (class I), beta polypeptide                                                   | M21692.1   | 125   |
| 209699_x_at | aldo-keto reductase family 1, member C2 (dihydrodiol dehydrogenase 2; bile acid binding)               | U05598.1   | 1646  |
| 209710_at   | hypothetical protein MGC2306                                                                           | AL563460   | 84724 |
| 209771_x_at | CD24 antigen (small cell lung carcinoma cluster 4 antigen)                                             | AA761181   | 934   |
| 209803_s_at | tumor suppressing subtransferable candidate 3                                                          | AF001294.1 | 7262  |
| 209846_s_at | butyrophilin, subfamily 3, member A2                                                                   | BC002832.1 | 11118 |
| 209875_s_at | secreted phosphoprotein 1 (osteopontin, bone sialoprotein I, early T-lymphocyte activatio              | M83248.1   | 6696  |
| 209883_at   | chromosome 1 open reading frame 17                                                                     | AF288389.1 | 23127 |
| 209956_s_at | calcium/calmodulin-dependent protein kinase (CaM kinase) II beta                                       | U23460.1   | 816   |
| 209987_s_at | achaete-scute complex-like 1 (Drosophila)                                                              | BC002341.1 | 429   |
| 209988_s_at | achaete-scute complex-like 1 (Drosophila)                                                              | BC001638.1 | 429   |
| 209993_at   | ATP-binding cassette, sub-family B (MDR/TAP), member 1                                                 | AF016535.1 | 5243  |
| 209994_s_at | ATP-binding cassette, sub-family B (MDR/TAP), member 1                                                 | AF016535.1 | 5243  |
| 210078_s_at | potassium voltage-gated channel, shaker-related subfamily, beta member 1                               | L39833.1   | 7881  |
| 210090_at   | activity-regulated cytoskeleton-associated protein                                                     | AF193421.1 | 23237 |
| 210095_s_at | insulin-like growth factor binding protein 3                                                           | M31159.1   | 3486  |
| 210221_at   | cholinergic receptor, nicotinic, alpha polypeptide 3                                                   | BC000513.1 | 1136  |
| 210302_s_at | mab-21-like 2 (C. elegans)                                                                             | AF262032.1 | 10586 |
| 210338_s_at | heat shock 70kDa protein 8                                                                             | AB034951.1 | 3312  |
| 210353_s_at | solute carrier family 6 (neurotransmitter transporter, noradrenalin), member 2                         | M65105.1   | 6530  |
| 210358_x_at | hypothetical protein MGC2306                                                                           | BC002557.1 | 84724 |
| 210404_x_at | calcium/calmodulin-dependent protein kinase (CaM kinase) II beta                                       | AF078803.1 | 816   |
| 210414_at   | fibronectin leucine rich transmembrane protein 1                                                       | AF169675.1 | 23769 |
| 210445_at   | fatty acid binding protein 6, ileal (gastrotropin)                                                     | U19869.1   | 2172  |
| 210495_x_at | fibronectin 1                                                                                          | AF130095.1 | 2335  |
| 210514_x_at | HLA-G histocompatibility antigen, class I, G                                                           | AF226990.2 | 3135  |
| 210764_s_at | cysteine-rich, angiogenic inducer, 61                                                                  | AF003114.1 | 3491  |

|             |                                                                                               |             |        |
|-------------|-----------------------------------------------------------------------------------------------|-------------|--------|
| 210881_s_at | insulin-like growth factor 2 (somatomedin A)                                                  | M17863.1    | 3481   |
| 211161_s_at | gb:AF130082.1 /DEF=Homo sapiens clone FLC1492 PRO3121 mRNA, complete cds. /FI                 | AF130082.1  |        |
| 211276_at   | my048 protein                                                                                 | AF063606.1  | 140597 |
| 211421_s_at | ret proto-oncogene (multiple endocrine neoplasia and medullary thyroid carcinoma 1, Hir       | M31213.1    | 5979   |
| 211430_s_at | immunoglobulin heavy constant gamma 3 (G3m marker)                                            | M87789.1    | 3502   |
| 211483_x_at | calcium/calmodulin-dependent protein kinase (CaM kinase) II beta                              | AF081924.1  | 816    |
| 211509_s_at | reticulon 4                                                                                   | AB015639.1  | 57142  |
| 211528_x_at | HLA-G histocompatibility antigen, class I, G                                                  | M90685.1    | 3135   |
| 211529_x_at | HLA-G histocompatibility antigen, class I, G                                                  | M90684.1    | 3135   |
| 211555_s_at | guanylate cyclase 1, soluble, beta 3                                                          | AF020340.1  | 2983   |
| 211564_s_at | LIM domain protein                                                                            | BC003096.1  | 8572   |
| 211666_x_at | gb:L22453.1 /DEF=Homo sapiens HIV-1 TAR RNA binding protein (TARBP-b) mRNA, co                | L22453.1    |        |
| 211696_x_at | hemoglobin, beta                                                                              | AF349114.1  | 3043   |
| 211698_at   | CREBBP/EP300 inhibitory protein 1                                                             | AF349444.1  | 23741  |
| 211699_x_at | hemoglobin, alpha 1                                                                           | AF349571.1  | 3039   |
| 211719_x_at | fibronectin 1                                                                                 | BC005858.1  | 2335   |
| 211737_x_at | pleiotrophin (heparin binding growth factor 8, neurite growth-promoting factor 1)             | BC005916.1  | 5764   |
| 211745_x_at | hemoglobin, alpha 2                                                                           | BC005931.1  | 3040   |
| 211799_x_at | H.sapiens mRNA for HLA-C alpha chain (Cw*1701)                                                | U62824.1    |        |
| 211813_x_at | decorin                                                                                       | AF138303.1  | 1634   |
| 211911_x_at | gb:L07950.1 /DEF=Homo sapiens MHC class I HLA B71 mRNA, complete cds. /FEA=CD                 | L07950.1    |        |
| 211936_at   | heat shock 70kDa protein 5 (glucose-regulated protein, 78kDa)                                 | AF216292.1  | 3309   |
| 211941_s_at | prostatic binding protein                                                                     | BF686267    | 5037   |
| 211962_s_at | zinc finger protein 36, C3H type-like 1                                                       | X79067.1    | 677    |
| 211980_at   | collagen, type IV, alpha 1                                                                    | NM_001845.1 | 1282   |
| 211984_at   | Homo sapiens calmodulin-I (CALM1) mRNA, 3'UTR, partial sequence                               | AI653730    |        |
| 211985_s_at | Homo sapiens calmodulin-I (CALM1) mRNA, 3'UTR, partial sequence                               | AI653730    |        |
| 211991_s_at | major histocompatibility complex, class II, DP alpha 1                                        | M27487.1    | 3113   |
| 211995_x_at | actin, gamma 1                                                                                | AL567820    | 71     |
| 212063_at   | CD44 antigen (homing function and Indian blood group system)                                  | BE903880    | 960    |
| 212085_at   | solute carrier family 25 (mitochondrial carrier; adenine nucleotide translocator), member 6   | AA916851    | 293    |
| 212094_at   | paternally expressed 10                                                                       | BE858180    | 23089  |
| 212097_at   | caveolin 1, caveolae protein, 22kDa                                                           | AU147399    | 857    |
| 212131_at   | DKFZP434D1335 protein                                                                         | AL117499.1  | 26065  |
| 212158_at   | syndecan 2 (heparan sulfate proteoglycan 1, cell surface-associated, fibroglycan)             | J04621.1    | 6383   |
| 212190_at   | serine (or cysteine) proteinase inhibitor, clade E (nexin, plasminogen activator inhibitor ty | AL541302    | 5270   |
| 212224_at   | aldehyde dehydrogenase 1 family, member A1                                                    | NM_000689.1 | 216    |
| 212230_at   | phosphatidic acid phosphatase type 2B                                                         | AL576654    | 8613   |
| 212298_at   | neuropilin 1                                                                                  | BE620457    | 8829   |
| 212464_s_at | fibronectin 1                                                                                 | X02761.1    | 2335   |
| 212560_at   | Homo sapiens cDNA: FLJ21930 fis, clone HEP04301, highly similar to HSU90916 Humai             | AV728268    |        |
| 212667_at   | myosin IF                                                                                     | AL575922    | 4542   |
| 212732_at   | maternally expressed 3                                                                        | AI950273    | 55384  |
| 212805_at   | KIAA0367 protein                                                                              | AB002365.1  | 23273  |
| 212884_x_at | apolipoprotein E                                                                              | AI358867    | 348    |
| 212915_at   | KIAA1095 protein                                                                              | AL569804    | 23024  |
| 212977_at   | G protein-coupled receptor                                                                    | AI817041    | 57007  |
| 212992_at   | hypothetical protein BC011859                                                                 | AI935123    | 113146 |
| 213016_at   | Homo sapiens clone 24630 mRNA sequence                                                        | BF448315    |        |
| 213135_at   | Human clone 23612 mRNA sequence                                                               | U90902.1    |        |
| 213182_x_at | cyclin-dependent kinase inhibitor 1C (p57, Kip2)                                              | R78668      | 1028   |
| 213183_s_at | cyclin-dependent kinase inhibitor 1C (p57, Kip2)                                              | R78668      | 1028   |

|             |                                                                                               |             |       |
|-------------|-----------------------------------------------------------------------------------------------|-------------|-------|
| 213187_x_at | ferritin, light polypeptide                                                                   | BG538564    | 2512  |
| 213241_at   | Homo sapiens clone 23785 mRNA sequence                                                        | AF035307.1  |       |
| 213280_at   | KIAA1039 protein                                                                              | AK000478.1  | 23108 |
| 213293_s_at | tripartite motif-containing 22                                                                | AA083478    | 10346 |
| 213404_s_at | Ras homolog enriched in brain 2                                                               | BF033683    | 6009  |
| 213453_x_at | glyceraldehyde-3-phosphate dehydrogenase                                                      | BF689355    | 2597  |
| 213479_at   | neuronal pentraxin II                                                                         | U26662.1    | 4885  |
| 213502_x_at | Homo sapiens cDNA FLJ32313 fis, clone PROST2003232, weakly similar to BETA-GLUC(X03529        |             |       |
| 213524_s_at | putative lymphocyte G0/G1 switch gene                                                         | NM_015714.1 | 50486 |
| 213553_x_at | apolipoprotein C-I                                                                            | W79394      | 341   |
| 213655_at   | tyrosine 3-monooxygenase/tryptophan 5-monooxygenase activation protein, epsilon poly(A)       | AA502643    | 7531  |
| 213664_at   | solute carrier family 1 (neuronal/epithelial high affinity glutamate transporter, system Xag) | AW235061    | 6505  |
| 213701_at   | Homo sapiens cDNA FLJ38158 fis, clone DFNES2001091                                            | AW299245    |       |
| 213757_at   | eukaryotic translation initiation factor 5A                                                   | BF541557    | 1984  |
| 213791_at   | proenkephalin                                                                                 | NM_006211.1 | 5179  |
| 213793_s_at | Homer, neuronal immediate early gene, 1B                                                      | BE550452    | 9456  |
| 213841_at   | Homo sapiens mRNA, chromosome 1 specific transcript KIAA0510                                  | BE223030    |       |
| 213847_at   | peripherin                                                                                    | NM_006262.1 | 5630  |
| 213869_x_at | Thy-1 cell surface antigen                                                                    | AA218868    | 7070  |
| 213921_at   | somatostatin                                                                                  | NM_001048.1 | 6750  |
| 213943_at   | twist homolog (acrocephalosyndactyly 3; Saethre-Chotzen syndrome) (Drosophila)                | X99268.1    | 7291  |
| 213975_s_at | tudor repeat associator with PCTAIRE 2                                                        | AV711904    | 23424 |
| 214079_at   | Homo sapiens cDNA FLJ20338 fis, clone HEP12179                                                | AK000345.1  |       |
| 214157_at   | GNAS complex locus                                                                            | AA401492    | 2778  |
| 214167_s_at | ribosomal protein, large, P0                                                                  | AA555113    | 6175  |
| 214218_s_at | Homo sapiens cDNA FLJ30298 fis, clone BRACE2003172                                            | AV699347    |       |
| 214247_s_at | dickkopf homolog 3 (Xenopus laevis)                                                           | AU148057    | 27122 |
| 214315_x_at | calreticulin                                                                                  | AI348935    | 811   |
| 214321_at   | nephroblastoma overexpressed gene                                                             | BF440025    | 4856  |
| 214414_x_at | hemoglobin, alpha 2                                                                           | T50399      | 3040  |
| 214428_x_at | complement component 4A                                                                       | K02403.1    | 720   |
| 214432_at   | hypothetical protein MGC13276                                                                 | NM_000703.1 | 95633 |
| 214451_at   | transcription factor AP-2 beta (activating enhancer binding protein 2 beta)                   | NM_003221.1 | 7021  |
| 214577_at   | microtubule-associated protein 1B                                                             | BG164365    | 4131  |
| 214607_at   | p21 (CDKN1A)-activated kinase 3                                                               | AW085556    | 5063  |
| 214610_at   | Homo sapiens cDNA FLJ36771 fis, clone ADRGL1000147, moderately similar to CYTOC               | AV702430    |       |
| 214611_at   | glutamate receptor, ionotropic, kainate 1                                                     | U16125.1    | 2897  |
| 214620_x_at | peptidylglycine alpha-amidating monooxygenase                                                 | BF038548    | 5066  |
| 214669_x_at | Homo sapiens isolate donor N clone N168K immunoglobulin kappa light chain variable re         | BG485135    |       |
| 214677_x_at | immunoglobulin lambda joining 3                                                               | X57812.1    | 28831 |
| 214678_x_at | zinc finger protein, X-linked                                                                 | R51161      | 7543  |
| 214723_x_at | KIAA1641 protein                                                                              | AB046861.1  | 57730 |
| 214761_at   | OLF-1/EBF associated zinc finger gene                                                         | AW149417    | 23090 |
| 214774_x_at | trinucleotide repeat containing 9                                                             | AK027006.1  | 27324 |
| 214836_x_at | immunoglobulin kappa constant                                                                 | BG536224    | 3514  |
| 214850_at   | SMA3                                                                                          | X75940.1    | 10571 |
| 214858_at   | Homo sapiens clone 24566 mRNA sequence                                                        | AF070536.1  |       |
| 215049_x_at | CD163 antigen                                                                                 | Z22969.1    | 9332  |
| 215076_s_at | collagen, type III, alpha 1 (Ehlers-Danlos syndrome type IV, autosomal dominant)              | AU144167    | 1281  |
| 215108_x_at | trinucleotide repeat containing 9                                                             | U80736.1    | 27324 |
| 215121_x_at | immunoglobulin lambda locus                                                                   | AA680302    | 3535  |
| 215193_x_at | major histocompatibility complex, class II, DR beta 3                                         | AJ297586.1  | 3125  |



|             |                                                                                                    |              |       |
|-------------|----------------------------------------------------------------------------------------------------|--------------|-------|
| 215311_at   | Homo sapiens mRNA full length insert cDNA clone EUROIMAGE 21920                                    | AL109696.1   |       |
| 215388_s_at | H factor (complement)-like 2                                                                       | X56210.1     | 3079  |
| 215440_s_at | hypothetical protein FLJ10097                                                                      | AL523320     | 56271 |
| 215643_at   | Homo sapiens cDNA FLJ11740 fis, clone HEMBA1005500                                                 | AU145680     |       |
| 215715_at   | solute carrier family 6 (neurotransmitter transporter, noradrenalin), member 2                     | BC000563.1   | 6530  |
| 215771_x_at | ret proto-oncogene (multiple endocrine neoplasia and medullary thyroid carcinoma 1, Hirs; X15786.1 |              | 5979  |
| 215946_x_at | Homo sapiens cDNA FLJ32313 fis, clone PROST2003232, weakly similar to BETA-GLU(                    | AL022324     |       |
| 215952_s_at | Homo sapiens clone IMAGE 172979                                                                    | AF090094.1   |       |
| 216216_at   | slit homolog 3 (Drosophila)                                                                        | AL122074.1   | 6586  |
| 216231_s_at | beta-2-microglobulin                                                                               | AW188940     | 567   |
| 216248_s_at | nuclear receptor subfamily 4, group A, member 2                                                    | S77154.1     | 4929  |
| 216379_x_at | KIAA1919 protein                                                                                   | AK000168.1   | 91749 |
| 216442_x_at | fibronectin 1                                                                                      | AK026737.1   | 2335  |
| 216470_x_at | Consensus includes gb:AF009664 /DEF=Homo sapiens T cell receptor beta locus, 3 try                 | AF009664     |       |
| 216520_s_at | Consensus includes gb:AF072098 /DEF=Homo sapiens HDCMB21P gene, complete cds                       | AF072098     |       |
| 216570_x_at | Consensus includes gb:AL096829 /DEF=Human DNA sequence from clone RP4-595K12                       | AL096829     |       |
| 216594_x_at | aldo-keto reductase family 1, member C2 (dihydrodiol dehydrogenase 2; bile acid binding            | S68290.1     | 1646  |
| 216598_s_at | chemokine (C-C motif) ligand 2                                                                     | S69738.1     | 6347  |
| 216623_x_at | trinucleotide repeat containing 9                                                                  | AK025084.1   | 27324 |
| 216834_at   | regulator of G-protein signalling 1                                                                | S59049.1     | 5996  |
| 216894_x_at | Consensus includes gb:D64137 /DEF=Human KIP2 gene for Cdk-inhibitor p57KIP2, com                   | D64137       |       |
| 216938_x_at | dopamine receptor D2                                                                               | S69899.1     | 1813  |
| 217022_s_at | Homo sapiens SNC73 protein (SNC73) mRNA, complete cds                                              | S55735.1     |       |
| 217028_at   | Consensus includes gb:AJ224869 /DEF=Homo sapiens CXCR4 gene encoding receptor                      | AJ224869     |       |
| 217057_s_at | Consensus includes gb:AF107846 /DEF=Homo sapiens neuroendocrine-specific Golgi pr                  | AF107846     |       |
| 217200_x_at | cytochrome b-561                                                                                   | U06715.1     | 1534  |
| 217232_x_at | Consensus includes gb:AF059180 /DEF=Homo sapiens mutant beta-globin (HBB) gene,                    | AF059180     |       |
| 217356_s_at | Phosphoglycerate kinase {alternatively spliced} [human, phosphoglycerate kinase defic              | S81916.1     |       |
| 217414_x_at | Consensus includes gb:V00489 /DEF=Human alpha-globin gene with flanks /FEA=mRN                     | V00489       |       |
| 217466_x_at | Consensus includes gb:L48784 /DEF=050 Homo sapiens cDNA /FEA=mRNA /DB_XREF                         | L48784       |       |
| 217621_at   | peter pan homolog (Drosophila)                                                                     | AI399889     | 56342 |
| 217732_s_at | integral membrane protein 2B                                                                       | AF092128.1   | 9445  |
| 217747_s_at | ribosomal protein S9                                                                               | NM_001013.1  | 6203  |
| 217767_at   | complement component 3                                                                             | NM_000064.1  | 718   |
| 217771_at   | golgi phosphoprotein 2                                                                             | NM_016548.1  | 51280 |
| 217788_s_at | UDP-N-acetyl-alpha-D-galactosamine:polypeptide N-acetylgalactosaminyltransferase 2                 | (NM_004481.2 | 2590  |
| 217871_s_at | macrophage migration inhibitory factor (glycosylation-inhibiting factor)                           | NM_002415.1  | 4282  |
| 217897_at   | FXFD domain containing ion transport regulator 6                                                   | NM_022003.1  | 53826 |
| 217911_s_at | BCL2-associated athanogene 3                                                                       | NM_004281.1  | 9531  |
| 217957_at   | transcription factor IIB                                                                           | NM_013242.1  | 29105 |
| 217983_s_at | ribonuclease 6 precursor                                                                           | NM_003730.2  | 8635  |
| 218041_x_at | hypothetical protein PRO1068                                                                       | NM_018573.1  | 55439 |
| 218147_s_at | glycosyltransferase AD-017                                                                         | NM_018446.1  | 55830 |
| 218172_s_at | hypothetical protein PRO2577                                                                       | NM_018630.1  | 55493 |
| 218179_s_at | hypothetical protein FLJ12716                                                                      | NM_021942.1  | 60684 |
| 218380_at   | hypothetical protein PP1044                                                                        | NM_021730.1  | 60368 |
| 218484_at   | NADH:ubiquinone oxidoreductase MLRQ subunit homolog                                                | NM_020142.1  | 56901 |
| 218541_s_at | chromosome 8 open reading frame 4                                                                  | NM_020130.1  | 56892 |
| 218872_at   | hypothetical protein FLJ20607                                                                      | NM_017899.1  | 54997 |
| 218880_at   | FOS-like antigen 2                                                                                 | N36408       | 2355  |
| 218952_at   | proprotein convertase subtilisin/kexin type 1 inhibitor                                            | NM_013271.1  | 27344 |
| 218974_at   | hypothetical protein FLJ10159                                                                      | NM_018013.1  | 55084 |

|             |                                                                                             |             |       |
|-------------|---------------------------------------------------------------------------------------------|-------------|-------|
| 219049_at   | chondroitin beta1,4 N-acetylgalactosaminyltransferase                                       | NM_018371.1 | 55790 |
| 219117_s_at | FK506 binding protein 11, 19 kDa                                                            | NM_016594.1 | 51303 |
| 219196_at   | secretogranin III                                                                           | NM_013243.1 | 29106 |
| 219228_at   | zinc finger protein 331; zinc finger protein 463                                            | NM_018555.2 | 55422 |
| 219304_s_at | spinal cord-derived growth factor-B                                                         | NM_025208.1 | 80310 |
| 219410_at   | hypothetical protein FLJ10134                                                               | NM_018004.1 | 55076 |
| 219478_at   | WAP four-disulfide core domain 1                                                            | NM_021197.1 | 58189 |
| 219534_x_at | cyclin-dependent kinase inhibitor 1C (p57, Kip2)                                            | NM_000076.1 | 1028  |
| 219659_at   | ATPase, aminophospholipid transporter-like, Class I, type 8A, member 2                      | AU146927    | 51761 |
| 219737_s_at | protocadherin 9                                                                             | AI524125    | 5101  |
| 219738_s_at | protocadherin 9                                                                             | NM_020403.1 | 5101  |
| 219777_at   | hypothetical protein FLJ22690                                                               | NM_024711.1 | 79765 |
| 219791_s_at | hypothetical protein FLJ11539                                                               | NM_024748.1 | 79804 |
| 219802_at   | hypothetical protein FLJ22028                                                               | NM_024854.1 | 79912 |
| 219895_at   | hypothetical protein FLJ20716                                                               | NM_017938.1 | 55026 |
| 219922_s_at | latent transforming growth factor beta binding protein 3                                    | NM_021070.1 | 4054  |
| 220136_s_at | crystallin, beta A2                                                                         | NM_005209.1 | 1412  |
| 220231_at   | G-substrate                                                                                 | NM_006658.1 | 10842 |
| 220370_s_at | KIAA1453 protein                                                                            | NM_025090.1 | 57602 |
| 220576_at   | hypothetical protein FLJ12377                                                               | NM_024989.1 | 80055 |
| 220795_s_at | KIAA1446 protein                                                                            | NM_020836.1 | 57596 |
| 220940_at   | KIAA1641 protein                                                                            | NM_025190.1 | 57730 |
| 220954_s_at | paired immunoglobulin-like receptor beta                                                    | NM_013440.1 | 29990 |
| 221127_s_at | regulated in glioma                                                                         | NM_006394.1 | 10530 |
| 221452_s_at | hypothetical protein MGC1223                                                                | NM_030969.1 | 81853 |
| 221476_s_at | ribosomal protein L15                                                                       | AF279903.1  | 6138  |
| 221651_x_at | immunoglobulin kappa constant                                                               | BC005332.1  | 3514  |
| 221671_x_at | immunoglobulin kappa constant                                                               | M63438.1    | 3514  |
| 221691_x_at | nucleophosmin (nucleolar phosphoprotein B23, numatrin)                                      | AB042278.1  | 4869  |
| 221701_s_at | hypothetical protein FLJ12541 similar to Stra6                                              | AF352728.1  | 64220 |
| 221728_x_at | Homo sapiens cDNA FLJ30298 fis, clone BRACE2003172                                          | AK025198.1  |       |
| 221766_s_at | chromosome 6 open reading frame 37                                                          | AL078599    | 55603 |
| 221771_s_at | M-phase phosphoprotein, mpp8                                                                | BC003542.1  | 54737 |
| 221801_x_at | Homo sapiens cDNA FLJ37371 fis, clone BRAMY2024711, moderately similar to Mus m             | NM_006158.1 |       |
| 221805_at   | neurofilament, light polypeptide 68kDa                                                      | NM_006158.1 | 4747  |
| 221916_at   | Homo sapiens cDNA FLJ37371 fis, clone BRAMY2024711, moderately similar to Mus m             | BF055311    |       |
| 222033_s_at | fms-related tyrosine kinase 1 (vascular endothelial growth factor/vascular permeability fac | AA058828    | 2321  |
| 222108_at   | Homo sapiens cDNA FLJ35792 fis, clone TESTI2005759                                          | AC004010    |       |
| 222162_s_at | a disintegrin-like and metalloprotease (repolysin type) with thrombospondin type 1 motif,   | AK023795.1  | 9510  |
| 266_s_at    | CD24 antigen (small cell lung carcinoma cluster 4 antigen)                                  | L33930      | 934   |
| 32088_at    | basic leucine zipper nuclear factor 1 (JEM-1)                                               | U79751      | 8548  |
| 33494_at    | electron-transferring-flavoprotein dehydrogenase                                            | S69232      | 2110  |
| 34031_i_at  | cerebral cavernous malformations 1                                                          | U90268      | 889   |
| 38241_at    | butyrophilin, subfamily 3, member A3                                                        | U90548      | 10384 |
| 39248_at    | aquaporin 3                                                                                 | N74607      | 360   |
| 41386_i_at  | KIAA0346 protein                                                                            | AB002344    | 23135 |
