# Supplementary material for: A HIF1α Regulatory Loop Links Hypoxia and Mitochondrial Signals in Pheochromocytomas
Source: PubMed Central journal article supplement (PMC1183527; doi:10.1371/journal.pgen.0010008), 2005-07-25
Supplement: pgen.0010008.sd005.pdf [file pgen.0010008.sd005.pdf]

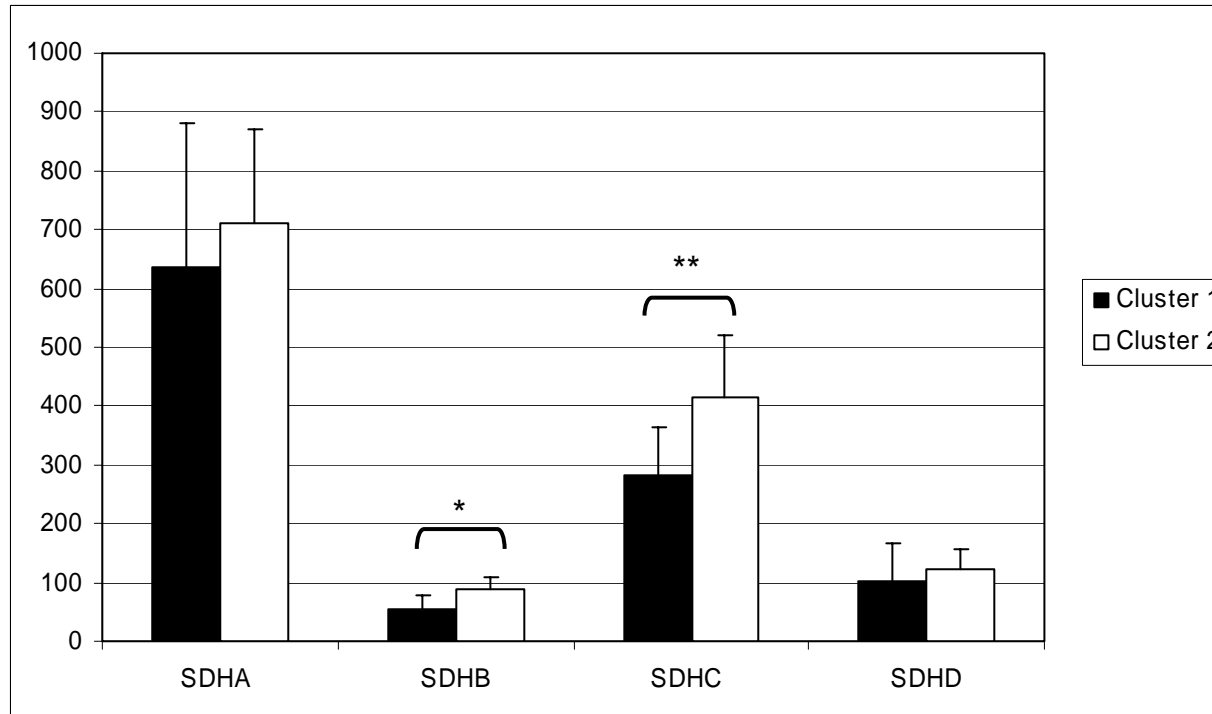

Supplementary Data 5. mRNA expression of the four subunits of complex II by U133 array in pheochromocytomas from cluster 1 and cluster 2. Results shown are the average of signal from multiple probes for each gene after normalization (see Methods for Details). \*  $p < 0.001$ ; \*\*  $p < 0.01$
